# Supplementary material for: DNA walker coupled with nicking endonuclease for sensitive electrochemical detection of saxitoxin
Source: Royal Society of Chemistry journal article supplement (doi:10.1039/d4sd00167b), 2024-01-01
Supplement: d4sd00167b1.pdf [file d4sd00167b1.pdf]

## DNA walker coupling with nicking endonuclease for highly selective electrochemical detection of saxitoxin

Yiwei Liu, Shumin Feng, Ruoxi Zhong, Yuanchang Peng, Guoyuan Mu, Jiayi Bai, Wei Chen\*, Zhan Qu\*

Department of Biophysics, Institute of Medical Engineering, School of Basic Medical Sciences, Health Science Center, Xi'an Jiaotong University, Xi'an 710061, China

Corresponding author: Wei Chen: [weiwccchen@xjtu.edu.cn](mailto:weiwccchen@xjtu.edu.cn); Zhan Qu: [zhan.qu@xjtu.edu.cn](mailto:zhan.qu@xjtu.edu.cn)

**Table S1.** List of DNA sequences

| Names       | Sequences (5' to 3')                                                                                |
|-------------|-----------------------------------------------------------------------------------------------------|
| Amplify DNA | TTTGCTGAAGG                                                                                         |
| STX Aptamer | TGAGGCACTGACGGTATTGAGGGTCGCATCCCGTGGAAA<br>CATGTTTCATTGGGCGCACTCCGCTTTCTGTAGATGGCTCT<br>AACTCTCCTCT |
| DNA walker  | TTTTTTTTTTTTTTTTTTTTTTTTTTTTTTTTTTTTTTTTTTTTTTTTTTTTTTTT<br>TTTGTCAGTGCCTCAGC                       |
